# Supplementary material for: Metabolism of Daidzein and Genistein by Gut Bacteria of the Class Coriobacteriia
Source: MDPI journal article supplement (doi:10.3390/foods10112741), 2021-11-09
Supplement: s1 [file s1]

**Supplemental Table S1:** Annotation of the conserved open reading frames (orfs) within the equol biosynthesis gene cluster of *Slackia isoflavoniconvertens* DSM 22006<sup>T</sup> (GenBank: JQ358709).

| Locus_tag   | Strand | Position <sup>a</sup> | Gene product                                          | Protein ID [sequence length] |
|-------------|--------|-----------------------|-------------------------------------------------------|------------------------------|
| <i>ifcA</i> | +      | 374-847               | hypothetical protein                                  | AFV15447.1 [157 aa]          |
| <i>ifcB</i> | +      | 866-1588              | putative electron transfer flavoprotein beta-subunit  | AFV15448.1 [240 aa]          |
| <i>ifcC</i> | +      | 1588-2496             | putative electron transfer flavoprotein alpha-subunit | AFV15449.1 [302 aa]          |
| <i>tdr</i>  | +      | 2572-4032             | tetrahydrodaidzein reductase                          | AFV15450.1 [486 aa]          |
| <i>ddr</i>  | +      | 4169-5026             | dihydrodaidzein reductase                             | AFV15451.1 [285 aa]          |
| <i>ifcD</i> | +      | 5150-5635             | hypothetical protein                                  | AFV15452.1 [161 aa]          |
| <i>dzr</i>  | +      | 5690-7624             | daidzein reductase                                    | AFV15453.1 [644 aa]          |

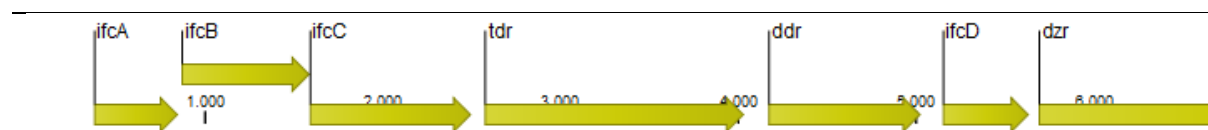

<sup>a</sup>, *Slackia isoflavoniconvertens* hypothetical protein (*ifcA*), putative electron transfer flavoprotein beta-subunit (*ifcB*), putative electron transfer flavoprotein alpha-subunit (*ifcC*), tetrahydrodaidzein reductase (*tdr*), dihydrodaidzein reductase (*ddr*), hypothetical protein (*ifcD*), and daidzein reductase (*dzr*) genes, complete cds. GenBank: JQ358709.

**Supplemental Table S2:** Annotation of the conserved open reading frames (orfs) within the equol biosynthesis gene cluster of *Slackia isoflavoniconvertens* DSM 22006<sup>T</sup> (NCBI reference sequence: NZ\_QIBZ01000017.1).

| Locus_tag     | Strand | Position <sup>a</sup> | Gene product                                                     | Protein ID [sequence length] |
|---------------|--------|-----------------------|------------------------------------------------------------------|------------------------------|
| DMP05_RS08425 | -      | 19422-20795           | ATP-binding protein                                              | WP_123220029.1 [457 aa]      |
| DMP05_RS08430 | -      | 21341-22750           | [FeFe] hydrogenase H-cluster maturation GTPase HydF              | WP_123220030.1 [469 aa]      |
| DMP05_RS08435 | -      | 22824-24275           | [FeFe] hydrogenase H-cluster radical SAM maturase HydG           | WP_123220031.1 [483 aa]      |
| DMP05_RS08440 | -      | 24300-25364           | [FeFe] hydrogenase H-cluster radical SAM maturase HydE           | WP_123220054.1 [354 aa]      |
| DMP05_RS08445 | -      | 25384-27102           | hydrogenase                                                      | WP_123220032.1 [572 aa]      |
| DMP05_RS08450 | -      | 27095-28948           | NAD(P)-binding protein                                           | WP_123220033.1 [617 aa]      |
| DMP05_RS08455 | +      | 29304-29423           | SDR family oxidoreductase                                        | WP_123220055.1 [39 aa]       |
| DMP05_RS08460 | -      | 29595-31529           | FAD-dependent oxidoreductase                                     | WP_123220034.1 [644 aa]      |
| DMP05_RS08465 | -      | 31584-32069           | hypothetical protein                                             | WP_123220035.1 [161 aa]      |
| DMP05_RS08470 | -      | 32193-33050           | SDR family oxidoreductase                                        | WP_123220036.1 [285 aa]      |
| DMP05_RS08475 | -      | 33187-34647           | FAD-dependent oxidoreductase                                     | WP_123220037.1 [486 aa]      |
| DMP05_RS08480 | -      | 34723-35631           | electron transfer flavoprotein subunit alpha/FixB family protein | WP_123220038.1 [302 aa]      |
| DMP05_RS08485 | -      | 35631-36353           | electron transfer flavoprotein subunit alpha                     | WP_123220039.1 [240 aa]      |
| DMP05_RS08490 | -      | 36372-36845           | glyoxalase                                                       | WP_123220056.1 [157 aa]      |

|               |   |             |                                         |                         |
|---------------|---|-------------|-----------------------------------------|-------------------------|
| DMP05_RS08495 | - | 37202-37891 | response regulator transcription factor | WP_123220057.1 [229 aa] |
|---------------|---|-------------|-----------------------------------------|-------------------------|

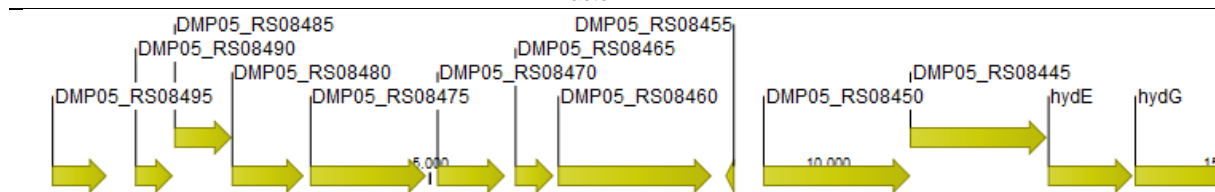

<sup>a</sup>, *Slackia isoflavoniconvertens* strain DSM 22006 DSM22006<sup>+</sup>\_contig\_017, whole genome shotgun sequence. NCBI Reference Sequence: NZ\_QIBZ01000017.1. Representation in reverse-complement.

**Supplemental Table S3:** Annotation of the conserved open reading frames (orfs) within the equol biosynthesis gene cluster of *Slackia equolifaciens* DSM 24851<sup>T</sup>.

| Locus_tag     | Strand | Position <sup>a</sup> | Gene product                                                     | Protein ID [sequence length] |
|---------------|--------|-----------------------|------------------------------------------------------------------|------------------------------|
| DMP06_RS06145 | -      | 33322-34662           | [FeFe] hydrogenase H-cluster maturation GTPase HydF              | WP_123208874.1 [446 aa]      |
| DMP06_RS06150 | -      | 34719-35780           | [FeFe] hydrogenase H-cluster radical SAM maturase HydE           | WP_123208875.1 [353 aa]      |
| DMP06_RS06155 | -      | 35791-37215           | [FeFe] hydrogenase H-cluster radical SAM maturase HydG           | WP_123208876.1 [474 aa]      |
| DMP06_RS06160 | -      | 37246-38157           | NAD(+)/NADH kinase                                               | WP_123208877.1 [303 aa]      |
| DMP06_RS06165 | -      | 38301-40019           | hydrogenase                                                      | WP_123208878.1 [572 aa]      |
| DMP06_RS06170 | -      | 40013-41851           | NAD(P)-binding protein                                           | WP_123208879.1 [612 aa]      |
| DMP06_RS06175 | -      | 41872-42177           | ferredoxin family protein                                        | WP_123208880.1 [101 aa]      |
| DMP06_RS06180 | -      | 42174-43487           | FAD-dependent oxidoreductase                                     | WP_123208881.1 [437 aa]      |
| DMP06_RS06185 | -      | 43689-45623           | FAD-binding protein                                              | WP_123208882.1 [644 aa]      |
| DMP06_RS06190 | -      | 45696-46199           | hypothetical protein                                             | WP_123208883.1 [167 aa]      |
| DMP06_RS06195 | -      | 46296-47228           | SDR family oxidoreductase                                        | WP_123208884.1 [310 aa]      |
| DMP06_RS06200 | -      | 47302-48762           | FAD-dependent oxidoreductase                                     | WP_123208885.1 [486 aa]      |
| DMP06_RS06205 | -      | 48874-49788           | electron transfer flavoprotein subunit alpha/FixB family protein | WP_013979961.1 [304 aa]      |
| DMP06_RS06210 | -      | 49789-50511           | electron transfer flavoprotein beta-subunit                      | WP_013979962.1 [240 aa]      |
| DMP06_RS06215 | -      | 50527-51003           | hypothetical protein                                             | WP_013979963.1 [158 aa]      |
| DMP06_RS06220 | -      | 51337-52116           | response regulator transcription factor                          | WP_123208886.1 [259 aa]      |

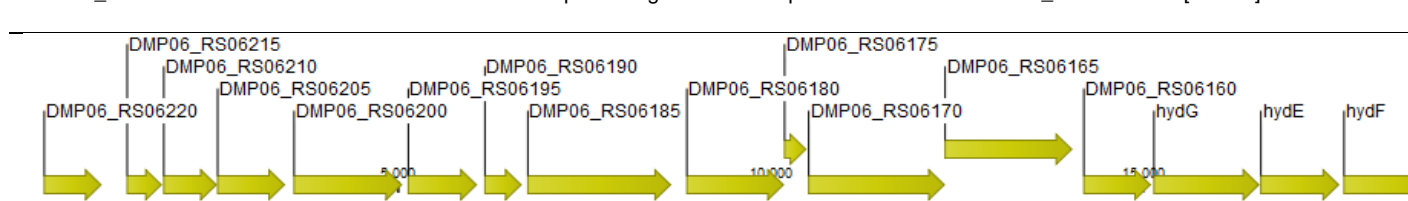

<sup>a</sup>, *Slackia equolifaciens* strain DSM 24851 DSM24851T\_contig\_009, whole genome shotgun sequence. NCBI Reference Sequence: NZ\_QIBX01000009.1. Representation in reverse-complement.

**Supplemental Table S4:** Annotation of the conserved open reading frames (orfs) within the equol biosynthesis gene cluster of *Eggerthella* sp. YY918.

| Locus_tag  | Strand | Position <sup>a</sup> | Gene product                                 | Protein ID<br>[sequence length] |
|------------|--------|-----------------------|----------------------------------------------|---------------------------------|
| EGYY_15650 | -      | 1675997-1677337       | hypothetical protein                         | BAK44705.1 [446 aa]             |
| EGYY_15660 | -      | 1677394-1678455       | hypothetical protein                         | BAK44706.1 [353 aa]             |
| EGYY_15670 | -      | 1678466-1679890       | hypothetical protein                         | BAK44707.1 [474 aa]             |
| EGYY_15680 | -      | 1679921-1680802       | hypothetical protein                         | BAK44708.1 [393 aa]             |
| EGYY_15690 | -      | 1680976-1682694       | hypothetical protein                         | BAK44709.1 [572 aa]             |
| EGYY_15700 | -      | 1682688-1684526       | hypothetical protein                         | BAK44710.1 [612 aa]             |
| EGYY_15710 | -      | 1684547-1684852       | ferredoxin-like protein                      | BAK44711.1 [101 aa]             |
| EGYY_15720 | -      | 1684849-1686162       | dehydrogenase                                | BAK44712.1 [437 aa]             |
| EGYY_15730 | -      | 1686364-1688298       | NADH:flavin oxidoreductase                   | BAK44713.1 [644 aa]             |
| EGYY_15740 | -      | 1688371-1688871       | predicted outer membrane protein             | BAK44714.1 [166 aa]             |
| EGYY_15750 | -      | 1688990-1689850       | hypothetical protein                         | BAK44715.1 [286 aa]             |
| EGYY_15760 | -      | 1689996-1691456       | hypothetical protein                         | BAK44716.1 [486 aa]             |
| EGYY_15770 | -      | 1691568-1692482       | electron transfer flavoprotein alpha-subunit | BAK44717.1 [304 aa]             |
| EGYY_15780 | -      | 1692483-1693205       | electron transfer flavoprotein beta-subunit  | BAK44718.1 [240 aa]             |
| EGYY_15790 | -      | 1693221-1693697       | hypothetical protein                         | BAK44719.1 [158 aa]             |
| EGYY_15800 | -      | 1694030-1694809       | hypothetical protein                         | BAK44720.1 [259 aa]             |

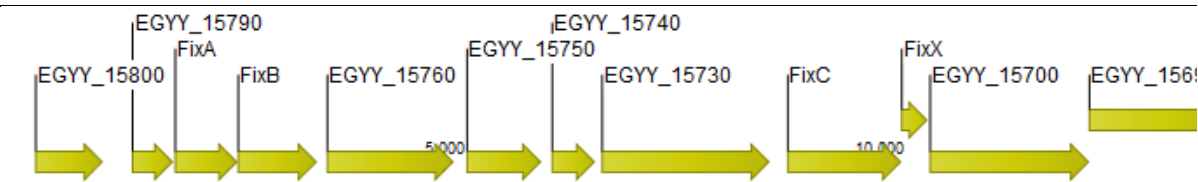

<sup>a</sup>, *Eggerthella* sp. YY918 DNA, complete genome. GenBank: AP012211.1. Representation in reverse-complement.

**Supplemental Table S5:** Annotation of the conserved open reading frames (orfs) within the equol biosynthesis gene cluster of *Adlercreutzia equolifaciens* subsp. *equolifaciens* DSM 19450<sup>T</sup>.

| Annotation and open orfs of the equol biosynthesis gene cluster of <i>Adlercreutzia equolifaciens</i> subsp. <i>equolifaciens</i> DSM 19450 <sup>T</sup> |        |                       |                                              |                                 |
|----------------------------------------------------------------------------------------------------------------------------------------------------------|--------|-----------------------|----------------------------------------------|---------------------------------|
| Locus_tag                                                                                                                                                | Strand | Position <sup>a</sup> | Gene product                                 | Protein ID<br>[sequence length] |
| AEQU_2235                                                                                                                                                | -      | 2791670-2792440       | two-component response regulator             | BAN78204.1 [256 aa]             |
| AEQU_2234                                                                                                                                                | -      | 2791008-2791460       | putative_dihydrodaizein_racemase             | BAN78203.1 [150 aa]             |
| AEQU_2233                                                                                                                                                | -      | 2790267-2790986       | electron transfer flavoprotein beta subunit  | BAN78202.1 [239 aa]             |
| AEQU_2232                                                                                                                                                | -      | 2789323-2790237       | electron transfer flavoprotein alpha subunit | BAN78201.1 [304 aa]             |
| AEQU_2231                                                                                                                                                | -      | 2787796-2789259       | putative_tetrahydrodaidzein_reductase        | BAN78200.1 [487 aa]             |

|           |   |                 |                                        |                     |
|-----------|---|-----------------|----------------------------------------|---------------------|
| AEQU_2230 | - | 2786868-2787716 | putative_dihydrodaidzein_reductase     | BAN78199.1 [282 aa] |
| AEQU_2229 | - | 2786295-2786774 | hypothetical protein                   | BAN78198.1 [159 aa] |
| AEQU_2228 | - | 2784304-2786232 | putative_daidzein_reductase            | BAN78197.1 [642 aa] |
| AEQU_2227 | - | 2782920-2784233 | flavin-dependent dehydrogenase         | BAN78196.1 [437 aa] |
| AEQU_2226 | - | 2782612-2782923 | putative ferredoxin                    | BAN78195.1 [103 aa] |
| AEQU_2225 | - | 2780557-2782395 | putative glutamate synthase            | BAN78194.1 [612 aa] |
| AEQU_2224 | - | 2778770-2780563 | dehydrogenase                          | BAN78193.1 [597 aa] |
| AEQU_2223 | - | 2777598-2778668 | conserved hypothetical protein         | BAN78192.1 [356 aa] |
| AEQU_2222 | - | 2776166-2777611 | putative thiamine biosynthesis protein | BAN78191.1 [481 aa] |
| AEQU_2221 | - | 2774610-2776022 | GTP-binding protein                    | BAN78190.1 [470 aa] |

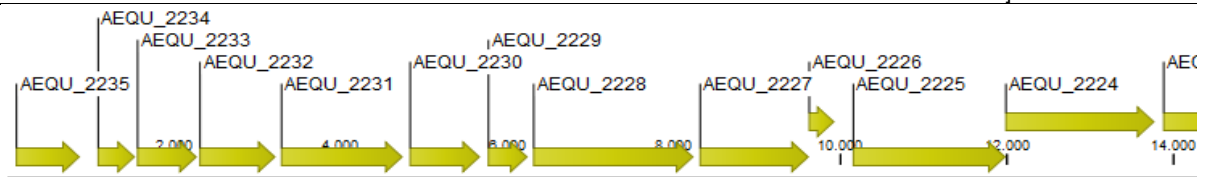

<sup>a</sup>, *Adlercreutzia equolifaciens* DSM 19450 DNA, complete genome. GenBank: AP013105.1. Representation in reverse-complement.

**Supplemental Table S6:** Annotation of the conserved open reading frames (orfs) within the equol biosynthesis gene cluster of *Adlercreutzia equolifaciens* subsp. *celatus* DSM 18785<sup>T</sup>.

| Locus_tag     | Strand | Position <sup>a</sup> | Gene product                                                     | Protein ID [sequence length] |
|---------------|--------|-----------------------|------------------------------------------------------------------|------------------------------|
| DMP10_RS02885 | -      | 162209-163516         | [FeFe] hydrogenase H-cluster maturation GTPase HydF              | WP_117283648.1 [435 aa]      |
| DMP10_RS02890 | -      | 163661-165103         | [FeFe] hydrogenase H-cluster radical SAM maturase HydG           | WP_117283649.1 [480 aa]      |
| DMP10_RS02895 | -      | 165090-166160         | [FeFe] hydrogenase H-cluster radical SAM maturase HydE           | WP_117283650.1 [356 aa]      |
| DMP10_RS02900 | -      | 166266-168059         | 2Fe-2S iron-sulfur cluster binding domain-containing protein     | WP_117283651.1 [597 aa]      |
| DMP10_RS02905 | -      | 168053-169891         | NAD(P)-binding protein                                           | WP_117283652.1 [612 aa]      |
| DMP10_RS02910 | -      | 170107-170418         | ferredoxin family protein                                        | WP_117283653.1 [103 aa]      |
| DMP10_RS02915 | -      | 170415-171728         | FAD-dependent oxidoreductase                                     | WP_117283654.1 [437 aa]      |
| DMP10_RS02920 | -      | 171799-173727         | NAD(P)-binding protein                                           | WP_035023034.1 [642 aa]      |
| DMP10_RS02925 | -      | 173792-174271         | hypothetical protein                                             | WP_022741750.1 [159 aa]      |
| DMP10_RS02930 | -      | 174365-175213         | SDR family oxidoreductase                                        | WP_117283655.1 [282 aa]      |
| DMP10_RS02935 | -      | 175294-176757         | FAD-dependent oxidoreductase                                     | WP_117283656.1 [487 aa]      |
| DMP10_RS02940 | -      | 176821-177735         | electron transfer flavoprotein subunit alpha/FixB family protein | WP_117283657.1 [304 aa]      |
| DMP10_RS02945 | -      | 177765-178484         | electron transfer flavoprotein subunit alpha                     | WP_117283658.1 [239 aa]      |
| DMP10_RS02950 | -      | 178506-178958         | glyoxalase                                                       | WP_117283659.1 [150 aa]      |
| DMP10_RS02955 | -      | 179168-180001         | response regulator transcription factor                          | WP_117283660.1 [277 aa]      |

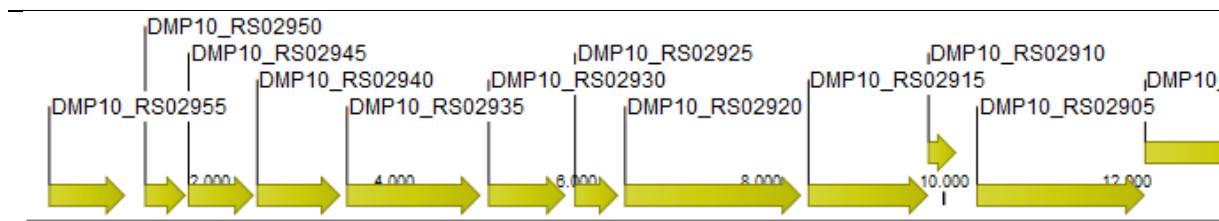

<sup>a</sup>, *Asaccharobacter celatus* DSM 18785 DSM18785T\_contig\_003, whole genome shotgun sequence. GenBank: NZ\_QICA01000003.1. Representation in reverse-complement.

**Supplemental Table S7:** Annotation of the conserved open reading frames (orfs) within the equol biosynthesis gene cluster of *Adlercreutzia mucosicola* DSM 19490<sup>T</sup>.

| Locus_tag      | Strand | Position <sup>a</sup> | Gene product                                                     | Protein ID [sequence length] |
|----------------|--------|-----------------------|------------------------------------------------------------------|------------------------------|
| G503_RS0111220 | -      | 48652-49869           | [FeFe] hydrogenase H-cluster maturation GTPase HydF              | WP_028027639.1 [405 aa]      |
| G503_RS0111225 | -      | 49881-51356           | [FeFe] hydrogenase H-cluster radical SAM maturase HydG           | WP_051191296.1 [491 aa]      |
| G503_RS0111230 | -      | 51316-52392           | [FeFe] hydrogenase H-cluster radical SAM maturase HydE           | WP_035023031.1 [358 aa]      |
| G503_RS0111235 | -      | 52482-54194           | hydrogenase                                                      | WP_028027642.1 [570 aa]      |
| G503_RS0111240 | -      | 54188-56026           | FAD-dependent oxidoreductase                                     | WP_028027643.1 [612 aa]      |
| G503_RS0111245 | -      | 56238-56549           | ferredoxin                                                       | WP_028027644.1 [103 aa]      |
| G503_RS0111250 | -      | 56546-57859           | FAD-dependent oxidoreductase                                     | WP_028027645.1 [437 aa]      |
| G503_RS0111255 | -      | 57930-59858           | NAD(P)-binding protein                                           | WP_035023034.1 [642 aa]      |
| G503_RS0111260 | -      | 59924-60403           | hypothetical protein                                             | WP_022741750.1 [159 aa]      |
| G503_RS14985   | -      | 60497-61345           | SDR family oxidoreductase                                        | WP_051191183.1 [282 aa]      |
| G503_RS0111270 | -      | 61426-62931           | FAD-dependent oxidoreductase                                     | WP_084636580.1 [501 aa]      |
| G503_RS0111275 | -      | 62952-63866           | electron transfer flavoprotein subunit alpha/FixB family protein | WP_028027648.1 [304 aa]      |
| G503_RS0111280 | -      | 63894-64613           | hypothetical protein                                             | WP_028027649.1 [239 aa]      |
| G503_RS0111285 | -      | 64632-65084           | hypothetical protein                                             | WP_051191185.1 [150 aa]      |
| G503_RS0111290 | -      | 65297-66067           | response regulator transcription factor                          | WP_028027651.1 [256 aa]      |

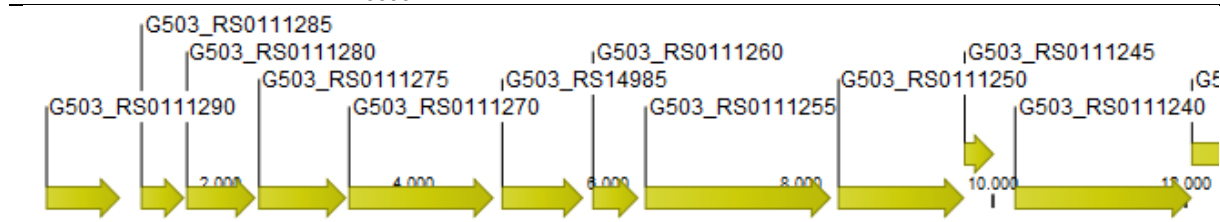

<sup>a</sup>, *Enterorhabdus mucosicola* DSM 19490 G503DRAFT\_scaffold00001.1, whole genome shotgun sequence, NCBI Reference Sequence: NZ\_KE383895.1. Representation in reverse-complement.

**Supplemental Table S8:** Annotation of the conserved open reading frames (orfs) within the equol biosynthesis gene cluster of *Senegalimassilia faecalis* KGMB04484<sup>T</sup>.

| Locus_tag     | Strand | Position <sup>a</sup> | Gene product                                                     | Protein ID [sequence length] |
|---------------|--------|-----------------------|------------------------------------------------------------------|------------------------------|
| ET524_RS10245 | +      | 2468498-2469688       | ABC transporter permease                                         | WP_129425566.1 [396 aa]      |
| ET524_RS10250 | +      | 2469894-2470664       | response regulator transcription factor                          | WP_129425568.1 [256 aa]      |
| ET524_RS10255 | +      | 2470964-2471437       | glyoxalase                                                       | WP_129425570.1 [157 aa]      |
| ET524_RS10260 | +      | 2471458-2472180       | hypothetical protein                                             | WP_129425572.1 [240 aa]      |
| ET524_RS10265 | +      | 2472181-2473095       | electron transfer flavoprotein subunit alpha/FixB family protein | WP_129425574.1 [304 aa]      |
| ET524_RS10270 | +      | 2473202-2474665       | FAD-dependent oxidoreductase                                     | WP_129425576.1 [487 aa]      |
| ET524_RS10275 | +      | 2474795-2475658       | SDR family oxidoreductase                                        | WP_129425578.1 [287 aa]      |
| ET524_RS10280 | +      | 2475780-2476280       | hypothetical protein                                             | WP_129425580.1 [166 aa]      |
| ET524_RS10285 | +      | 2476353-2478287       | NAD(P)-binding protein                                           | WP_129425582.1 [644 aa]      |
| ET524_RS10290 | +      | 2478487-2479788       | FAD-dependent oxidoreductase                                     | WP_129425584.1 [433 aa]      |
| ET524_RS10295 | +      | 2479785-2480084       | ferredoxin family protein                                        | WP_129425586.1 [99 aa]       |
| ET524_RS10300 | +      | 2480101-2481939       | FAD-dependent oxidoreductase                                     | WP_129425588.1 [612 aa]      |
| ET524_RS10305 | +      | 2481932-2483650       | 2Fe-2S iron-sulfur cluster binding domain-containing protein     | WP_129425590.1 [572 aa]      |
| ET524_RS10310 | +      | 2483651-2484703       | [FeFe] hydrogenase H-cluster radical SAM maturase HydE           | WP_129425592.1 [350 aa]      |
| ET524_RS10315 | +      | 2484700-2486151       | [FeFe] hydrogenase H-cluster radical SAM maturase HydG           | WP_129425594.1 [483 aa]      |
| ET524_RS10320 | +      | 2486163-2487413       | [FeFe] hydrogenase H-cluster maturation GTPase HydF              | WP_129425596.1 [416 aa]      |

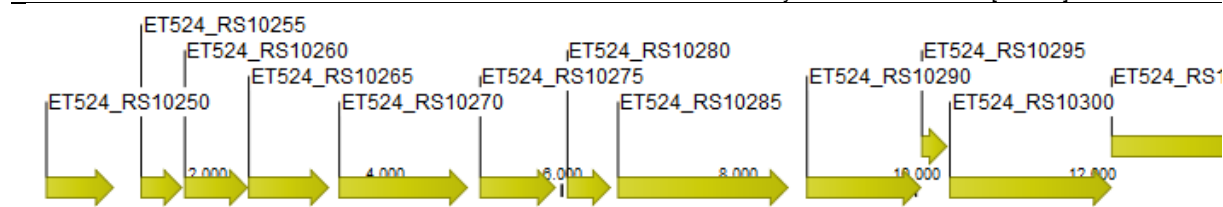

<sup>a</sup>, *Senegalimassilia faecalis* strain KGMB04484 KGMB04484\_contig00001, whole genome shotgun sequence. GenBank: NZ\_SDPW01000001.1

**Supplemental Table S9:** Annotation of the conserved open reading frames (orfs) within the equol biosynthesis gene cluster of *'Hugonella massiliensis'* AT8<sup>T</sup>.

| Locus_tag          | Strand | Position <sup>a</sup> | Gene product                                                     | Protein ID [sequence length] |
|--------------------|--------|-----------------------|------------------------------------------------------------------|------------------------------|
| BN3270_RS0023<br>5 | -      | 10492-11235           | response regulator transcription factor                          | WP_058985114.1 [247 aa]      |
| BN3270_RS0023<br>0 | -      | 9734-10156            | glyoxalase                                                       | WP_058985167.1 [140 aa]      |
| BN3270_RS0022<br>5 | -      | 8987-9730             | hypothetical protein                                             | WP_082673216.1 [247 aa]      |
| BN3270_RS0022<br>0 | -      | 8072-8986             | electron transfer flavoprotein subunit alpha/FixB family protein | WP_058985112.1 [304 aa]      |
| BN3270_RS0021<br>5 | -      | 6536-7999             | FAD-dependent oxidoreductase                                     | WP_058985111.1 [487 aa]      |
| BN3270_RS0021<br>0 | -      | 5607-6467             | SDR family oxidoreductase                                        | WP_082673215.1 [286 aa]      |
| BN3270_RS0020<br>5 | -      | 4978-5460             | hypothetical protein                                             | WP_058985110.1 [160 aa]      |

|                |   |           |                              |                         |
|----------------|---|-----------|------------------------------|-------------------------|
| BN3270_RS00200 | - | 2981-4978 | NAD(P)-binding protein       | WP_082673214.1 [665 aa] |
| BN3270_RS00195 | - | 1548-2918 | FAD-dependent oxidoreductase | WP_082673213.1 [456 aa] |
| BN3270_RS00190 | - | 1237-1548 | ferredoxin                   | WP_058985165.1 [103 aa] |
| BN3270_RS00185 | - | 90-1193   | NAD(P)-binding protein       | WP_058985107.1 [367 aa] |

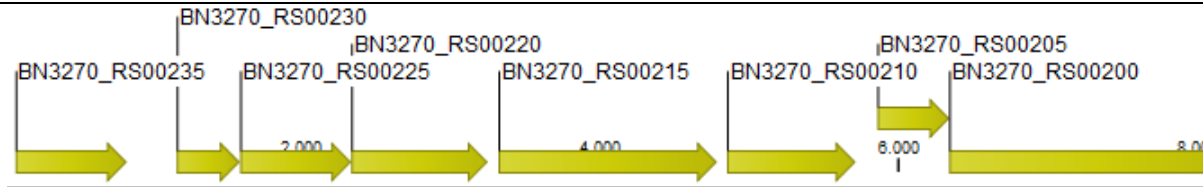

<sup>a</sup>, *Eggerthellaceae bacterium* A18, whole genome shotgun sequence. GenBank: NZ\_LN908982.1 (GCF\_001486445.1)<sup>\*</sup>. Representation in reverse-complement.

<sup>\*</sup>During preparation of this manuscript this whole genome sequence was removed by RefSeq staff.

**Supplemental Table S10:** Annotation of the conserved open reading frames (orfs) within the equol biosynthesis gene cluster of *Lactococcus garvieae* 20-92.

| Locus_tag            | Strand | Position <sup>a</sup> | Gene product                                  | Protein ID [sequence length] |
|----------------------|--------|-----------------------|-----------------------------------------------|------------------------------|
| BAJ72746.1 / ORF-US4 | +      | 46-960                | unnamed protein product; ORF-US4              | BAJ72746.1 [304 aa]          |
| I-thdr               | +      | 1072-2532             | tetrahydrodaidzein reductase                  | BAJ72747.1 [486 aa]          |
| I-dhdr               | +      | 2678-3538             | dihydrodaidzein reductase                     | BAJ72748.1 [286 aa]          |
| BAJ72749.1 / ORF-US1 | +      | 3635-4138             | unnamed protein product; ORF-US1              | BAJ72749.1 [167 aa]          |
| I-dznr               | +      | 4211-6145             | daidzein reductase                            | BAJ72750.1 [644 aa]          |
| BAJ72751.1 / ORF-DS1 | +      | 6279-7658             | unnamed protein product; ORF-DS1              | BAJ72751.1 [459 aa]          |
| BAJ72752.1 / ORF-DS2 | +      | 7888- >9228           | unnamed protein product; ORF-DS2 (incomplete) | BAJ72752.1 [447 aa]          |

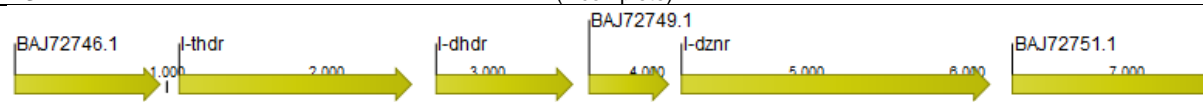

<sup>a</sup>, *Lactococcus garvieae* ORF-US4, I-thdr, I-dhdr, ORF-US1, I-dznr, ORF-DS1, ORF-DS2 genes, complete and partial cds, strain: 20-92. GenBank: AB593374.

**Supplemental Table S11:** Annotation of the conserved open reading frames (orfs) within the equol biosynthesis gene cluster of *Slackia* sp. AUH-JLC159.

| Locus_tag | Strand | Position <sup>a</sup> | Gene product                     | Protein ID [sequence length] |
|-----------|--------|-----------------------|----------------------------------|------------------------------|
| dgr       | +      | 105-2039              | daidzein and genistein reductase | AIC80887.1 [644 aa]          |

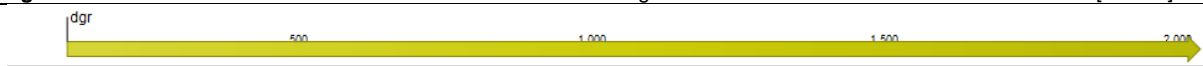

<sup>a</sup>, *Slackia* sp. AUH-JLC159 daidzein and genistein reductase (*dgr*) gene, partial cds. GenBank: KJ452760.



**Supplemental Table S12:** Annotation of the conserved open reading frames (orfs) within the equol biosynthesis gene cluster of *Slackia* sp. NATTS.

| Locus_tag     | Strand | Position <sup>a</sup> | Gene product                      | Protein ID [sequence length] |
|---------------|--------|-----------------------|-----------------------------------|------------------------------|
| <b>dece-1</b> | +      | 490-1950              | DHD-to-equol conversion enzyme 1  | BAL46928.1 [486 aa]          |
| <b>dece-2</b> | +      | 2059-2907             | DHD-to-equol conversion enzyme 2  | BAL46929.1 [282 aa]          |
| <b>ORF</b>    | +      | 3027-3509             | ORF (predicted)                   | no protein ID [161 aa]       |
| <b>ddce</b>   | +      | 3567-5501             | daidzein-to-DHD conversion enzyme | BAL46930.1 [644 aa]          |



<sup>a</sup>, *Slackia* sp. NATTS *dece-1*, *dece-2*, *ddce* genes for DHD to equol conversion enzyme 1, DHD to equol conversion enzyme 2, daidzein to DHD conversion enzyme, complete cds. GenBank: AB646272.1.



**Supplemental Data S13:** Results of validation (accuracy, intra-day precision, recovery, LOD, LOQ and linearity) of LC-DAD analyses of daidzein, genistein and corresponding microbial metabolites in fermentation samples of pure cultures.

For accuracy and intra-day precision six analyte-free fermentation samples inoculated with *E. lenta* DSM 2243<sup>T</sup> were spiked with a standard mixture of analytes (final concentration in injected samples each 40 µM) and processed as described.

Additionally, six analyte-free fermentation samples inoculated with *E. lenta* DSM 2243<sup>T</sup> and without spiking the standard mixture prior to extraction were processed and spiked during solvation of extraction residue prior to LC-DAD analysis. To calculate recoveries, the peak areas of analytes in these samples were compared to peak areas of analytes in fermentation samples spiked with analytes before extraction. SD, standard deviation.

|                                   | Retention time [min] | Accuracy <sup>a</sup> [%] | Intra-day precision [%] | Recovery (mean ± SD) [%] | Limit of detection <sup>b</sup> (LOD) [µM] | Limit of quantitation <sup>c</sup> (LOQ) [µM] |
|-----------------------------------|----------------------|---------------------------|-------------------------|--------------------------|--------------------------------------------|-----------------------------------------------|
| <b>Daidzein LC-DAD method</b>     |                      |                           |                         |                          |                                            |                                               |
| Daidzein                          | 6.3                  | 103.3                     | 1.4                     | 93.0 ± 1.1               | 0.06                                       | 1.08                                          |
| Dihydrodaidzein                   | 5.8                  | 102.6                     | 1.4                     | 93.6 ± 1.1               | 0.06                                       | 1.07                                          |
| Equol                             | 9.1                  | 102.5                     | 1.5                     | 91.9 ± 1.0               | 0.17                                       | 1.09                                          |
| O-Desmethyl-angolensin            | 12.1                 | 102.4                     | 1.7                     | 90.2 ± 1.4               | 0.06                                       | 1.11                                          |
| <b>Genistein LC-DAD method</b>    |                      |                           |                         |                          |                                            |                                               |
| Genistein                         | 6.4                  | 100.4                     | 1.2                     | 94.5 ± 1.2               | 0.06                                       | 1.06                                          |
| Dihydrogenistein                  | 5.7                  | 100.9                     | 1.1                     | 95.7 ± 1.1               | 0.05                                       | 1.04                                          |
| 6'-hydroxy-O-Desmethyl-angolensin | 6.9                  | 99.5                      | 3.5                     | 66.7 ± 2.6               | 0.08                                       | 1.48                                          |

<sup>a</sup> corrected for recoveries

<sup>b</sup> calculated for signal/noise = 3 in LC-DAD; values for initial incubation solution and corrected for recoveries

<sup>c</sup> lowest calibration samples (2 µM) in LC-DAD were set as LOQ; values for initial incubation solution and corrected for recoveries

### Linearity

To quantify analytes, an external standard calibration was conducted. Therefore, calibration samples (4 levels) in pure solvent were prepared with final concentrations (in injected samples) ranging each from 2.0 to 200 µM. Calibration curves were obtained by linear regression using none weighting for the “Daidzein LC-DAD method” and a weighting of 1/C<sup>2</sup> for the “Genistein LC-DAD method”. In the validation experiment, the correlation coefficient was used as an indicator for the quality of the calibration curves and was ≥0.999978.
